# Supplementary material for: Codoped porous carbon nanofibres as a potassium metal host for nonaqueous K-ion batteries
Source: PubMed Central journal article supplement (PMC9392754; doi:10.1038/s41467-022-32660-y), 2022-08-20
Supplement: 41467_2022_32660_MOESM3_ESM.pdf [file 41467_2022_32660_MOESM3_ESM.pdf]

### **Descriptions of Additional Supplementary Files**

Supplementary Movie 1. K infusion experiment on MSCNFs.

Supplementary Movie 2. K infusion experiment on Cu foils.

Supplementary Movie 3. K infusion experiment on cPAN.

Supplementary Movie 4. K infusion experiment on cPAN-Zn.
